# Supplementary material for: A novel cementitious microfiltration membrane: mechanisms of pore formation and properties for water permeation
Source: Royal Society of Chemistry journal article supplement (doi:10.1039/c4ra08980d), 2014-11-21
Supplement: c4ra08980d1.pdf [file c4ra08980d1.pdf]

**Supplementary Materials for**  
**A Novel Cementitious Microfiltration Membrane: Mechanisms**  
**of Pore Formation and Properties for Water Permeation**

*Zhe Wang, Zhonglin Chen, Jing Chang, Jimin Shen\*, Jing Kang, Lei Yang, Qian Chen*

*(State Key Laboratory of Urban Water Resource and Environment, School of Municipal &  
Environmental Engineering, Harbin Institute of Technology, Harbin 150090, China)*

*Corresponding author e-mail: shenjimin@hit.edu.cn; Tel: +86-451-86287000; fax: +86-451-  
86283028.*

Fig. S1 Pore size distribution of three cementitious membranes (A, B, C) fabricated under the same condition (using the quartz-to-cement ratio of 4.0) to test the accuracy and stability of the Pore Size Distribution Analyzer (PSDA).

Table S1 Chemical composition of the cement used in this research.

| Cement | CaO<br>(wt%) | SiO <sub>2</sub><br>(wt%) | Al <sub>2</sub> O <sub>3</sub><br>(wt%) | Fe <sub>2</sub> O <sub>3</sub><br>(wt%) | SO <sub>3</sub><br>(wt%) | Mg<br>(wt%) |
|--------|--------------|---------------------------|-----------------------------------------|-----------------------------------------|--------------------------|-------------|
| PO 425 | 53.7         | 24.1                      | 7.9                                     | 4.0                                     | 3.9                      | 1.3         |
